# Supplementary material for: Solid phase oxime ligations for the iterative synthesis of polypeptide conjugates
Source: Royal Society of Chemistry journal article supplement (doi:10.1039/c4ob00760c), 2014-01-01

## Supporting information

### Solid phase oxime ligations for the iterative synthesis of polypeptide conjugates

Isidore E. Decostaire, Dominique Lelièvre, Vincent Aucagne, Agnès F. Delmas

Centre de Biophysique Moléculaire, CNRS UPR 4301, Rue Charles Sadron, 45071Orléans cedex 2, France. E-mail: [delmas@cnrs-orleans.fr](mailto:delmas@cnrs-orleans.fr)

|                                                                 |      |
|-----------------------------------------------------------------|------|
| ☞ C-terminal peptide resin <b>2</b>                             |      |
| p S2                                                            |      |
| ☞ Internal peptide aldehyde <b>3</b>                            | p S3 |
| ☞ N-Terminal segments <b>4</b>                                  |      |
| - Peptide aldehyde <b>4a</b> (PADRE-[1-20]MUC1-CHO)             | p S4 |
| - Peptide aldehyde <b>4b</b> ([1-20]MUC1-CHO)                   | p S5 |
| ☞ Ligation intermediates                                        |      |
| - <i>N</i> -Aloc-protected Aoa-containing polypeptide <b>6'</b> | p S6 |
| - Aoa-containing polypeptide <b>7'</b>                          | p S7 |
| ☞ Final products                                                |      |
| - <b>1a</b>                                                     | p S8 |
| - <b>1b</b>                                                     | p S9 |

↳ C-terminal peptide resin 2

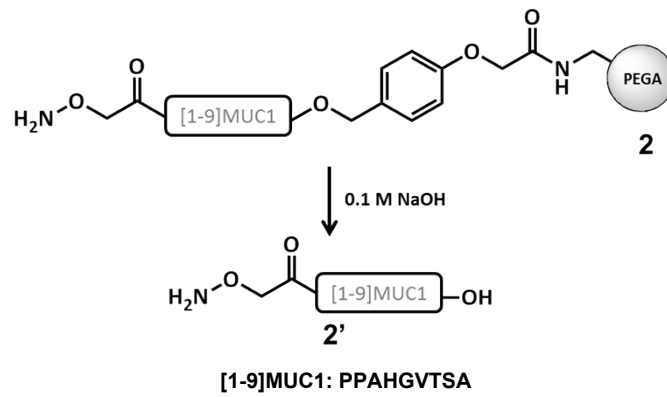

- HPLC analytical gradient: 3-30% B/A over 30 min. Retention time: 16.3 min.  
MALDI/TOF  $[M+H]^+$   $m/z = 909.3$  (calcd for  $C_{38}H_{61}N_{12}O_{14}$ , 909.4).

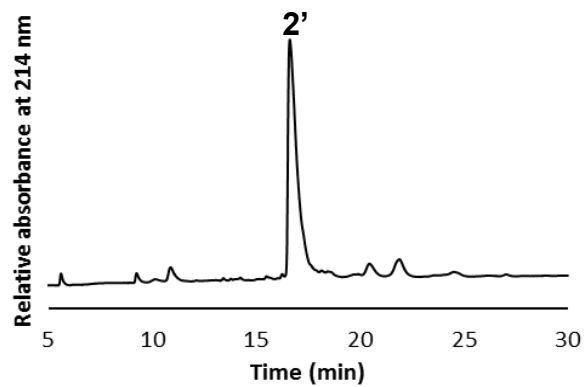

Internal peptide aldehyde 3

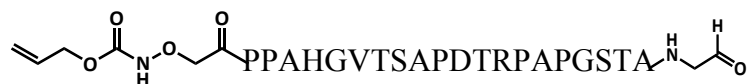

- HPLC analytical gradient: 10-35% B/A over 40 min. Retention time: 21.1 min.  
MALDI-TOF:  $[M+H]^+$   $m/z = 2085.0$  (calcd for  $C_{88}H_{138}N_{27}O_{32}$ , 2085.0).

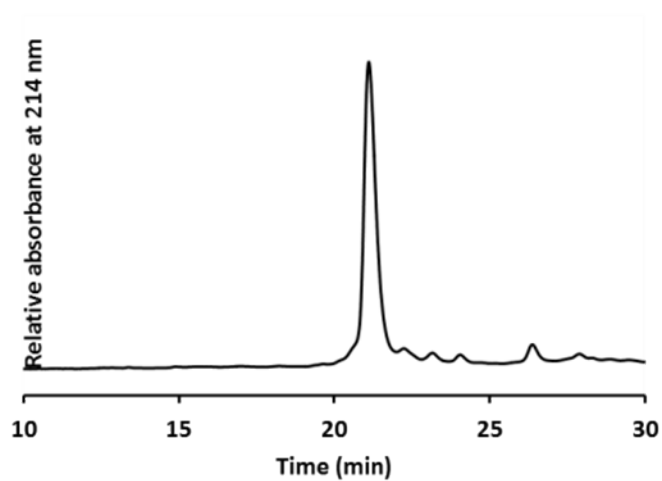

Peptide aldehyde **4a** (PADRE-[1-20]MUC1-CHO)  
PADRE (pan DR epitope)

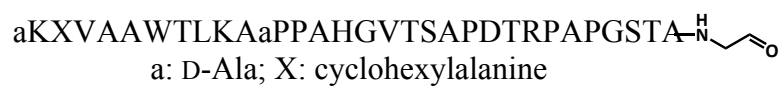

- HPLC analytical gradient: 10-35% B/A over 40 min. Retention time: 32.2 min.  
MALDI-TOF:  $[M+H]^+$   $m/z = 3192.8$  (calcd for  $C_{144}H_{232}N_{41}O_{41}$  3191.7).

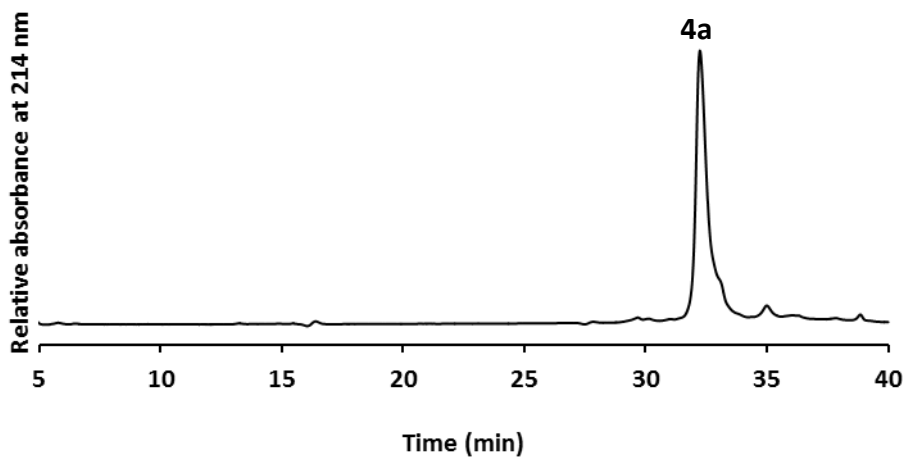

Peptide aldehyde **4b** ([1-20]MUC1-CHO)

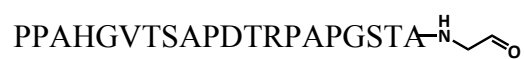

- HPLC analytical gradient: 10-35% B/A over 40 minutes. Retention time: 13.0 min.  
MALDI-TOF:  $[M+H]^+$   $m/z = 1927.9$  (calcd for  $C_{82}H_{130}N_{26}O_{28}$ , 1928.0).

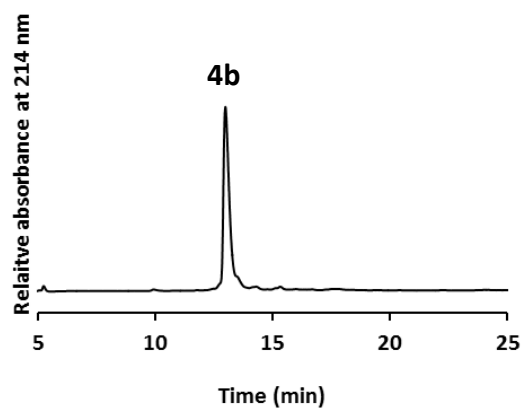

*N*-Alloc-protected Aoa-containing polypeptide **6'**

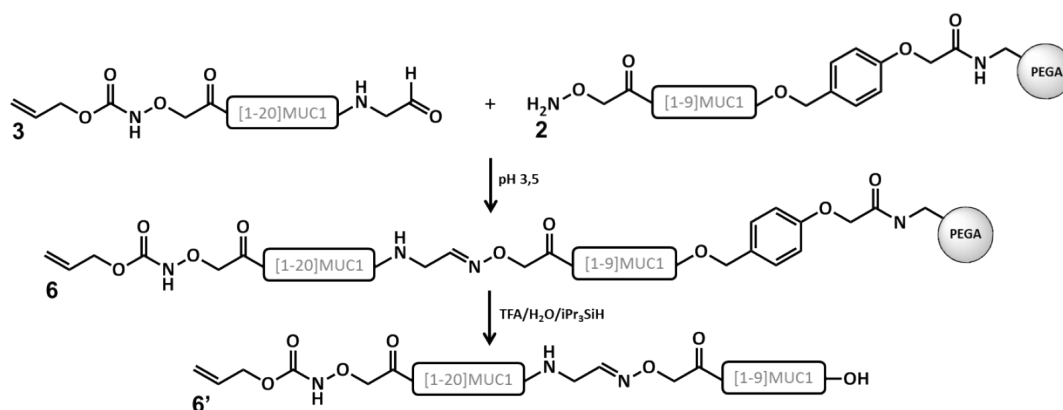

- HPLC analytical gradient : 10-35% B/A over 40 minutes. Retention time: 23.9 min.  
MALDI-TOF:  $[\text{M}+\text{H}]^+$   $m/z = 2976.9$  (calcd for  $\text{C}_{126}\text{H}_{196}\text{N}_{39}\text{O}_{45}$ , 2975.4).

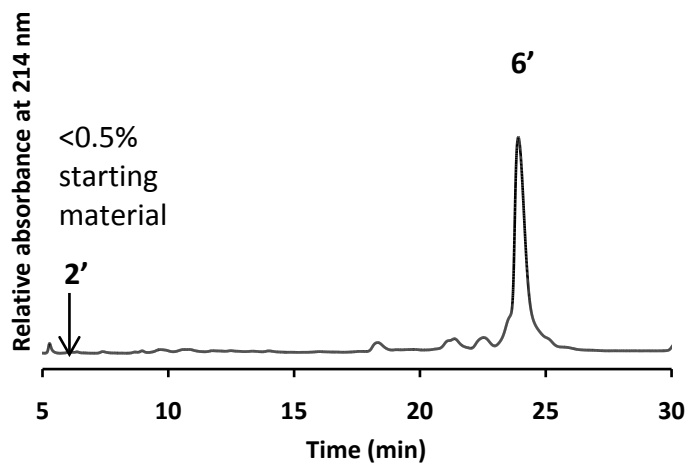

Starting material **2'** analyzed using the same gradient

HPLC analytical gradient : 10-35% B/A over 40 minutes. Retention time: 6.2 min.

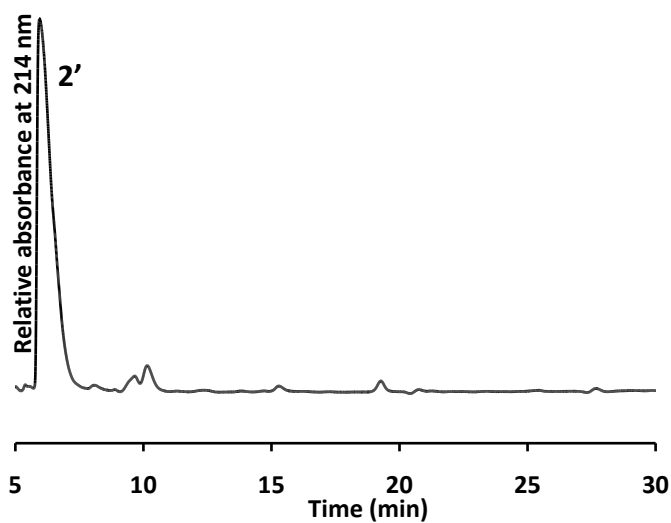

↻ Aoa-containing polypeptide 7'

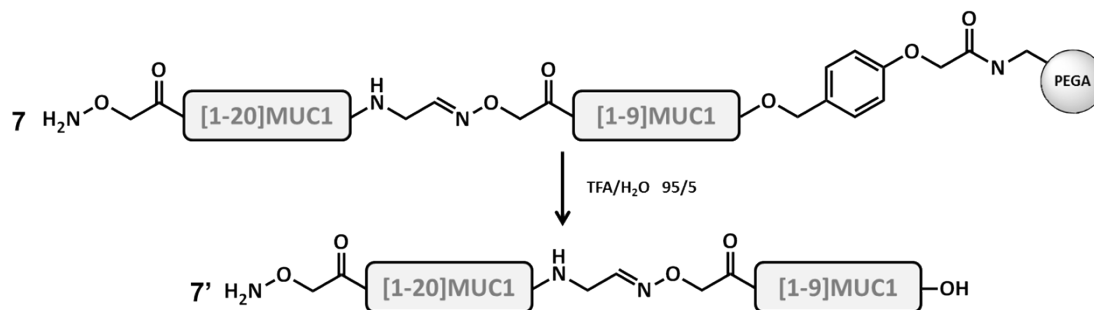

- HPLC analytical gradient: 3-39% B/A over 40 minutes. Retention time: 14.5 min.  
MALDI-TOF:  $[M+H]^+$   $m/z = 2892.6$  (calcd for C<sub>122</sub> H<sub>192</sub> N<sub>39</sub> O<sub>43</sub>, 2891.4).

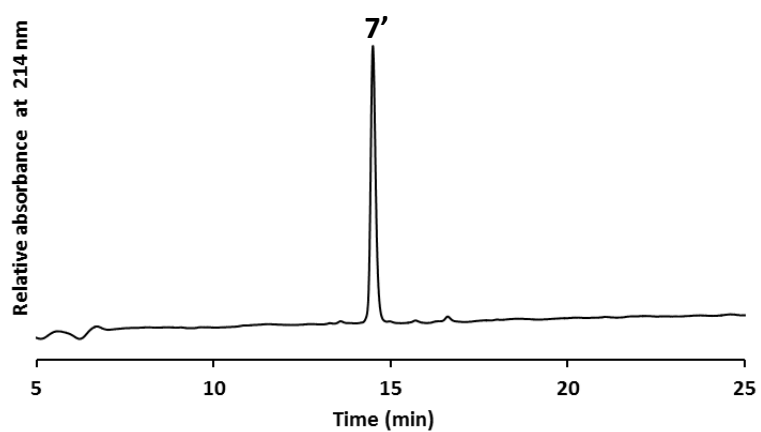

1a

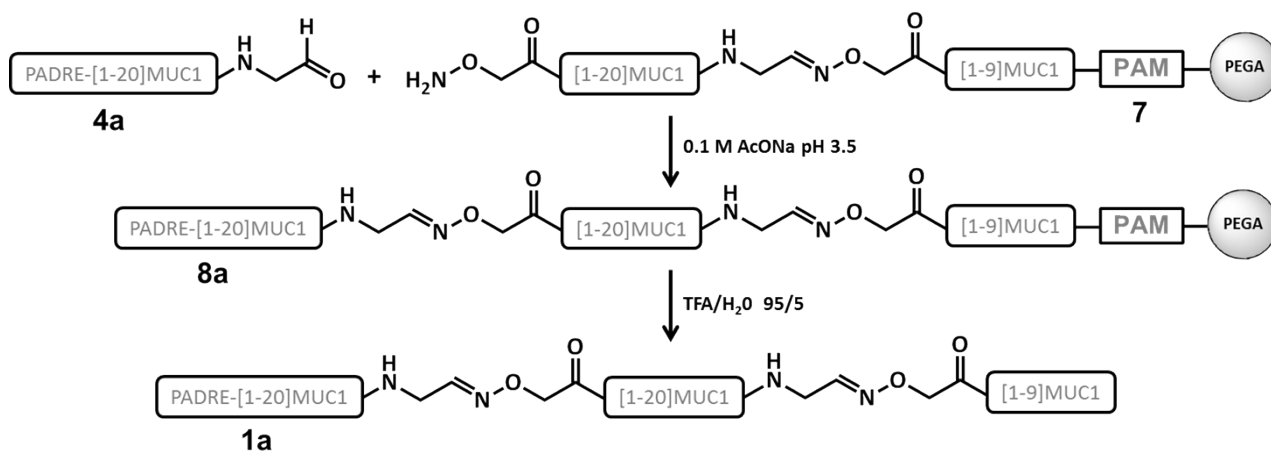

- HPLC analytical gradient : 10-35% B/A over 40 min. Retention time: 35.8 min.  
 MALDI-TOF:  $[\text{M}+2\text{H}]^+ m/z = 3037.5$  ( $[\text{M}]$ : calcd for  $\text{C}_{266}\text{H}_{419}\text{N}_{80}\text{O}_{83}$ , 6063.1) average mass.

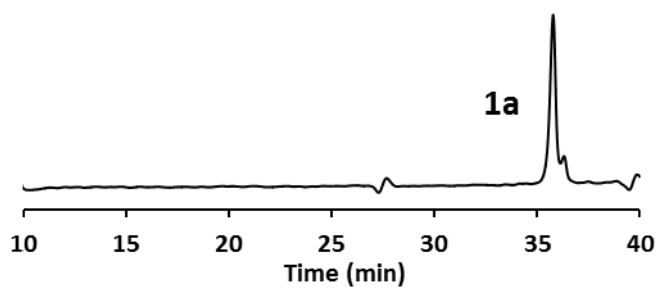



**1b**

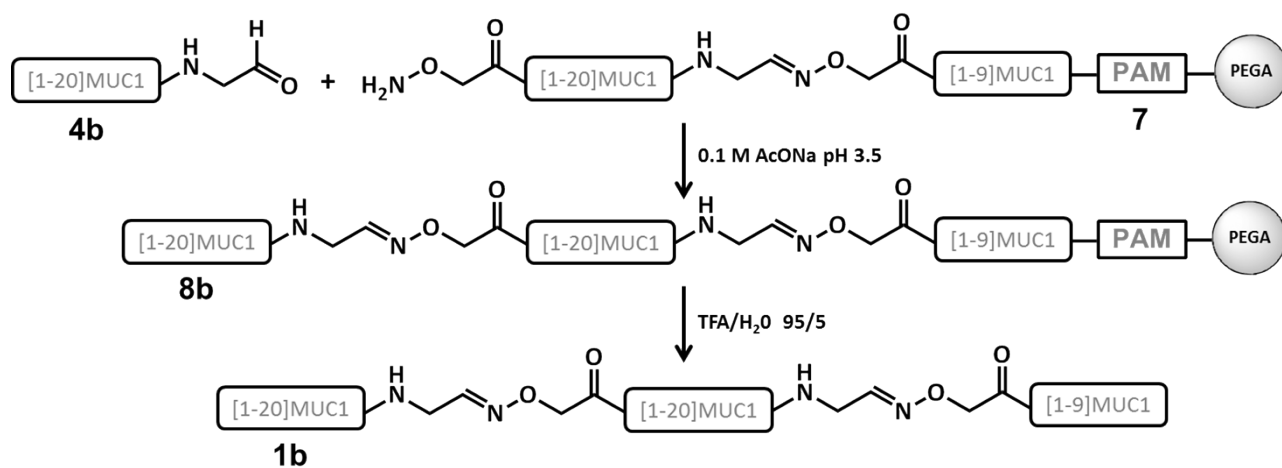

- HPLC analytical gradient: 10-35% B/A over 40 min. Retention time: 17.3 min.
- MALDI-TOF:  $[\text{M}+\text{H}]^+ m/z = 4802.7$  (calcd for  $\text{C}_{204}\text{H}_{320}\text{N}_{65}\text{O}_{70}$ , 4803.2), average mass.

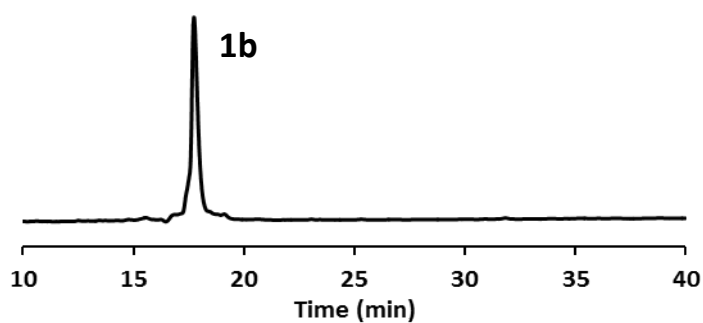

Supplement: c4ob00760c1.pdf [file c4ob00760c1.pdf]
